# Supplementary material for: The Expression Patterns and Roles of Lysyl Oxidases in Aortic Dissection
Source: PubMed Central journal article supplement (PMC8292648; doi:10.3389/fcvm.2021.692856), 2021-07-07
Supplement: Data_Sheet_1.pdf [file Data_Sheet_1.pdf]

## Supplemental Materials

**Table S1. The clinical information of patients with TAAD**

| Clinical items            | TAAD group (n=33) |
|---------------------------|-------------------|
| Age (year)                | 49.91±7.67        |
| Male [n (%)]              | 30 (90.91)        |
| Smoking [n (%)]           | 15 (45.45)        |
| Alcohol [n (%)]           | 7 (21.21)         |
| Hypertension [n (%)]      | 18 (54.55)        |
| Diabetes mellitus [n (%)] | 3 (9.09)          |
| Heart rate (bpm)          | 82.27±17.60       |
| Systolic pressure (mmHg)  | 131.24±26.52      |
| diastolic pressure (mmHg) | 70.33±13.72       |
| Diameter of aorta (mm)    |                   |
| aortic arch (mm)          | 41.18±5.32        |
| ascending aorta (mm)      | 48.81±6.94        |
| thoracic aorta (mm)       | 35.36±4.38        |
| abdominal aorta (mm)      | 30.10±2.62        |

The data are represented as the mean ± standard deviation (SD) or as percentage. TAAD: Stanford type A aortic dissection; Bpm: beats per minute;

**Table S2. Real-time PCR primers**

| Primer names                    | Primers                     |
|---------------------------------|-----------------------------|
| Human-LOX forward primer        | 5'-GCATACAGGGCAGATGTCAGA-3' |
| Human-LOX reverse primer        | 5'-TTGGCATCAAGCAGGTCATAG-3' |
| Human-LOXL1 forward primer      | 5'-TGCCACCAGCATTACCACAG-3'  |
| Human-LOXL1 reverse primer      | 5'-GAGGTTGCCGAAGTCACAGG-3'  |
| Human-LOXL2 forward primer      | 5'-CTGCAAGTTCAATGCCGAGT-3'  |
| Human-LOXL2 reverse primer      | 5'-TCTCCACCAGCACCTCCACTC-3' |
| Human-LOXL3 forward primer      | 5'-CGGATGTGAAGCCAGGAAACT-3' |
| Human-LOXL3 reverse primer      | 5'-AGGCATCACCAATGTGGCA-3'   |
| Human-LOXL4 forward primer      | 5'-CAAAGGGTCCTGGGCAGAG-3'   |
| Human-LOXL4 reverse primer      | 5'-ACACGACACTGGCAGAGATG-3'  |
| Human-18S- forward primer       | 5'-CTCAACACGGGAAACCTCAC-3'  |
| Human-18S- reverse primer       | 5'-CGCTCCACCAACTAAGAACG-3'  |
| Human-PCNA- forward primer      | 5'-AGGTGTTGGAGGCACTCAAG-3'  |
| Human-PCNA- reverse primer      | 5'-CGCGTTATCTTCGGCCCTTA-3'  |
| Human-Cyclin D1- forward primer | 5'-ATGCCAACCTCCTCAACGAC-3'  |
| Human-Cyclin D1- reverse primer | 5'-AAGACCTCCTCCTCGCACTT-3'  |
| Human-COL1A2- forward primer    | 5'-TGAACCTTGTTGCTGAGGGCA-3' |
| Human-COL1A2- reverse primer    | 5'-ACTGGGCCAATGTCCACAAA-3'  |

**Figure S1**

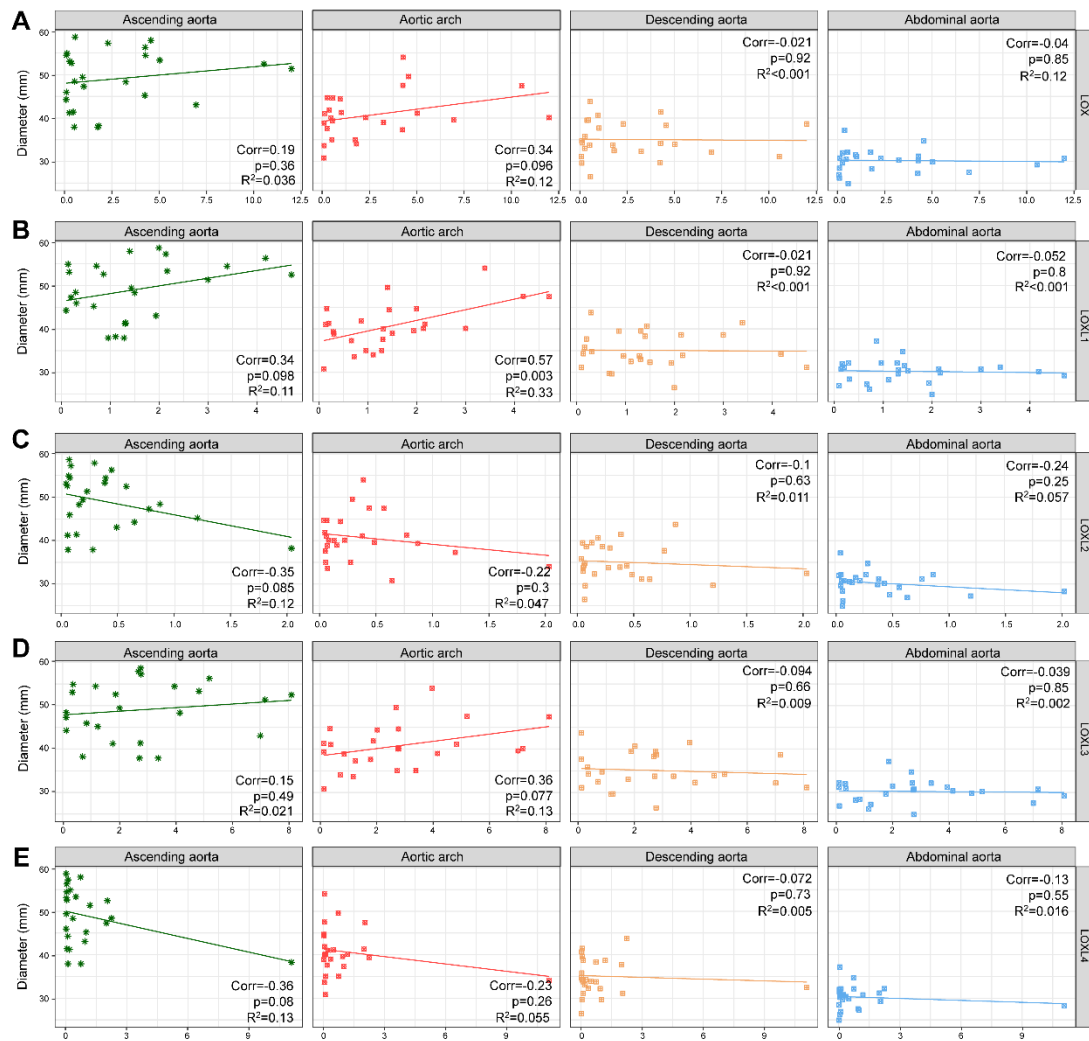

**Figure S1. Correlation analysis between LOXs mRNA expression levels and aortic diameters. (A-E)** Pearson correlation analysis was used to analyze the correlation between LOXs mRNA levels and the diameters of the ascending aorta, aortic arch, descending aorta and abdominal aorta.
